# Supplementary material for: Urban-development-induced Changes in the Diversity and Composition of the Soil Bacterial Community in Beijing
Source: PubMed Central journal article supplement (PMC5146926; doi:10.1038/srep38811), 2016-12-09
Supplement: srep38811-s1.pdf [file srep38811-s1.pdf]

## Supplementary information

### Urban-development-induced Changes in the Diversity and Composition of the Soil Bacterial Community in Beijing

Bing Yan<sup>1,2</sup>, Junsheng Li<sup>2\*</sup>, Nengwen Xiao<sup>2</sup>, Yue Qi<sup>1,2</sup>, Gang Fu<sup>1,2</sup>, Gaohui Liu<sup>2</sup>, Mengping Qiao<sup>3</sup>

<sup>1</sup>College of Water Sciences, Beijing Normal University, Beijing, China

<sup>2</sup>Chinese Research Academy of Environmental Sciences, Beijing, China

<sup>3</sup>School of Environment and Natural Resources, Renmin University of China, Beijing, China

\*Correspondence and requests for materials should be addressed to J.L. (lijsh@craes.org.cn)

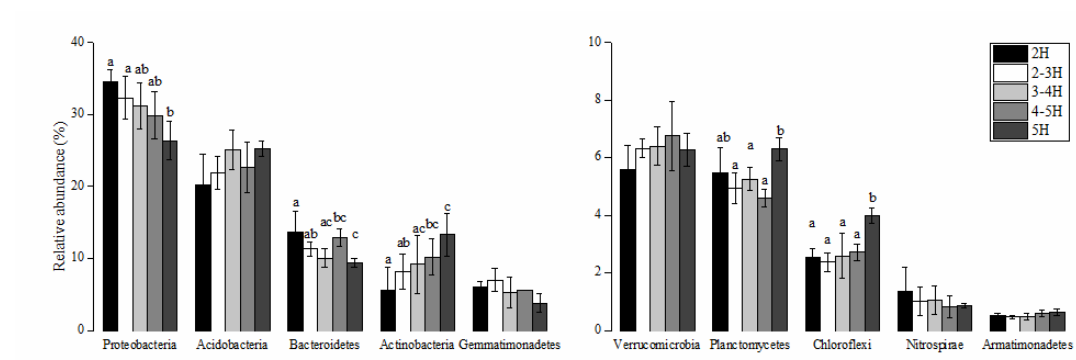

**Figure. S1** Relative abundance (means  $\pm$ SD) of the most abundant phyla in different ring areas. Different letters denote significant differences between groups.

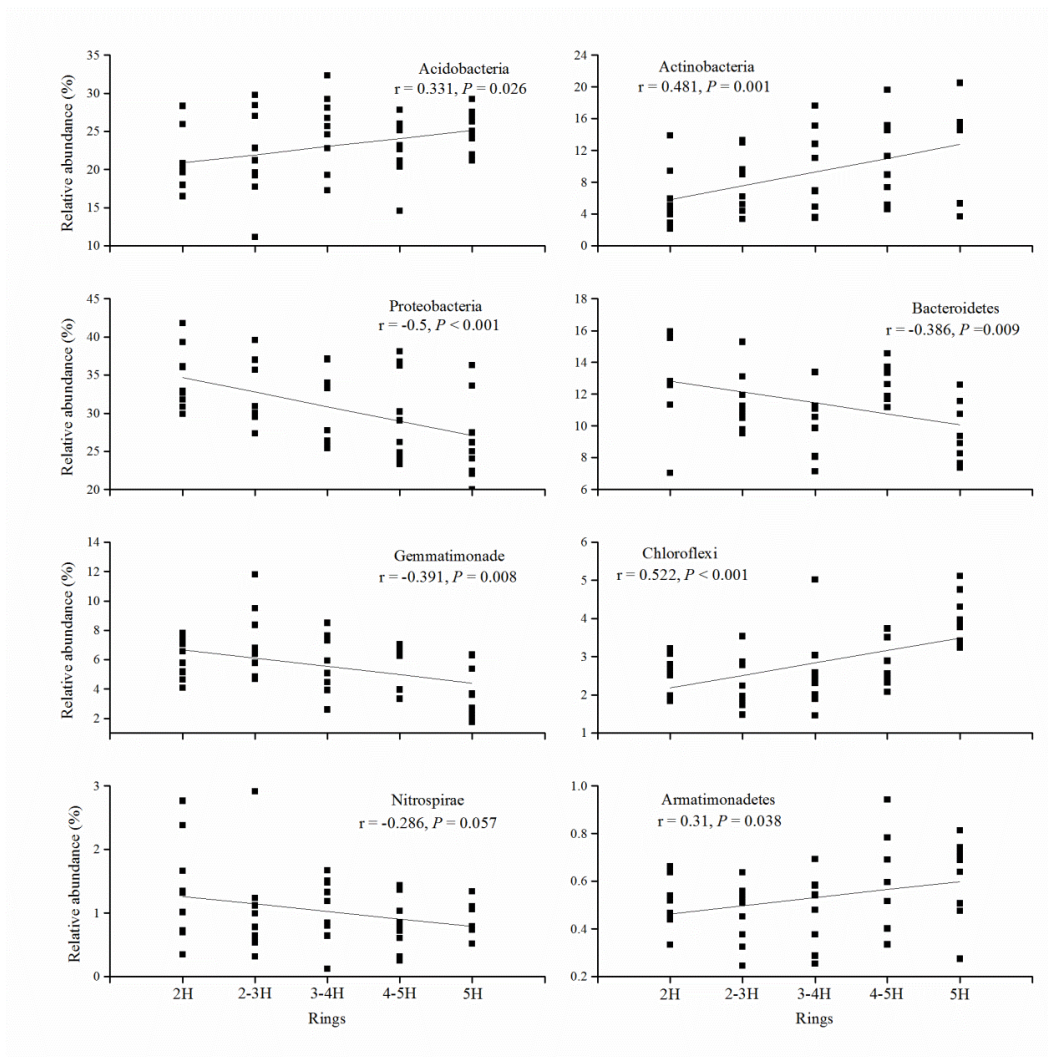

**Figure. S2** Relationship between relative abundances of dominant bacterial phyla and ring roads.

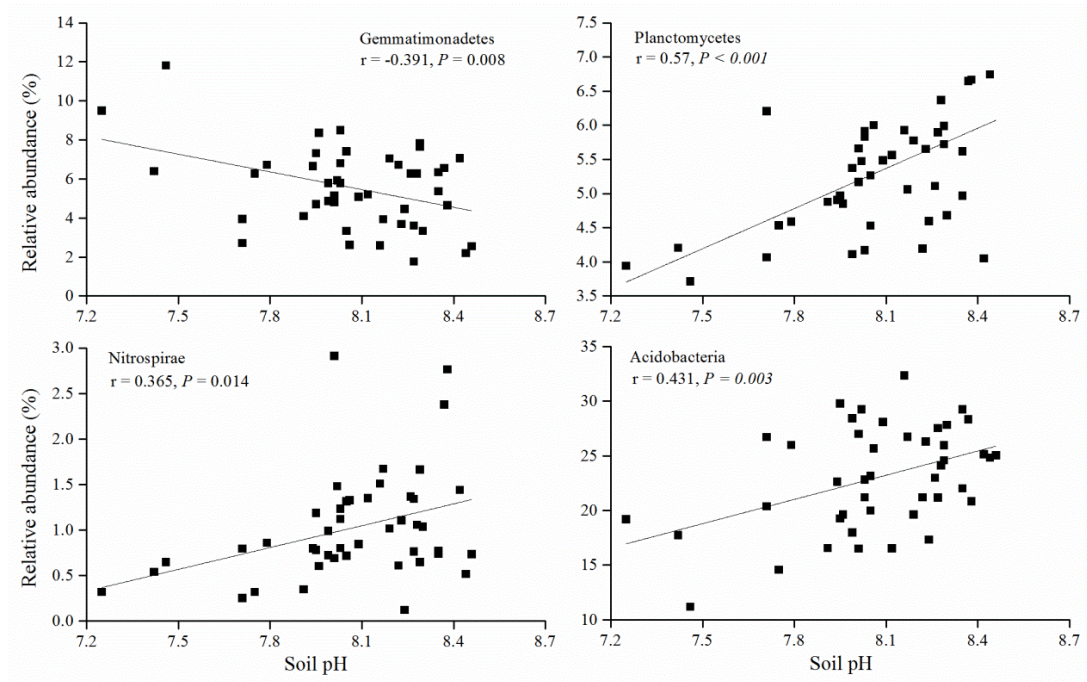

**Figure. S3** Relationship among relative abundances of dominant bacterial phyla and soil pH.

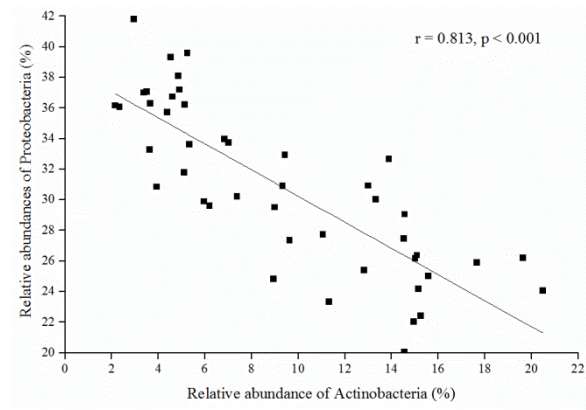

**Figure. S4** Relationship between the relative abundance of Proteobacteria and Actinobacteria.

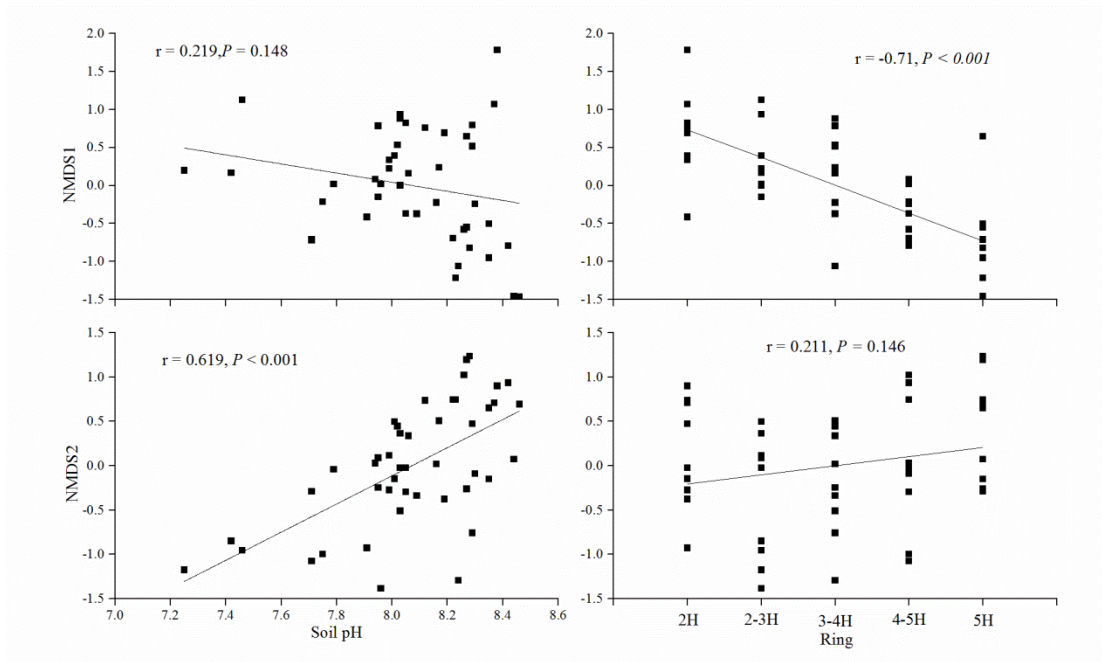

**Figure. S5** Pairwise regression of NMDS scores and soil pH value for urban ring road areas.

**Table S1** Soil physical and chemical properties used for this study

| Sample | pH          | Moisture(%)  | EC<br>(ds m <sup>-1</sup> ) | SBD<br>(g cm <sup>-3</sup> ) | Total C<br>(g kg <sup>-1</sup> ) | Total N<br>(g kg <sup>-1</sup> ) |
|--------|-------------|--------------|-----------------------------|------------------------------|----------------------------------|----------------------------------|
| 2H     | 8.15±0.17ab | 18.42±6.19a  | 1.15±0.32b                  | 1.325±0.11a                  | 31.67±9.36a                      | 1.77±0.80a                       |
| 2-3H   | 7.88±0.31c  | 15.42±3.38ab | 1.37±0.32b                  | 1.334±0.12a                  | 29.44±9.12a                      | 1.45±0.38ab                      |
| 3-4H   | 8.11±0.11ab | 11.72±4.79bc | 1.43±0.43b                  | 1.360±0.09a                  | 31.38±17.69ab                    | 1.42±0.78ab                      |
| 4-5H   | 8.10±0.25b  | 12.43±2.8bc  | 2.69±1.17a                  | 1.238±0.42a                  | 24.92±6.66ab                     | 1.20±0.62ab                      |
| 5H     | 8.31±0.11a  | 9.27±5.86c   | 2.24±1.18a                  | 1.434±0.13a                  | 19.79±4.30b                      | 1.07±0.40b                       |

Means of nine replicates per sites are presented (with standard deviation).

Different letters in the same column indicate significant difference between sites ( $P < 0.05$ ).

**Table S2** Spearman's correlations (r) between urban ring roads and soil characteristics.

|          | r      | p      |
|----------|--------|--------|
| pH       | 0.384  | 0.009  |
| EC       | 0.535  | <0.001 |
| SBD      | 0.273  | 0.069  |
| TC       | -0.449 | 0.002  |
| TN       | -0.411 | 0.005  |
| Moisture | -0.497 | 0.001  |

TC, total carbon; TN, total nitrogen; SBD, soil bulk density; EC, electrical conductivity.

**Table S3** Classified phyla from all the soil samples collected from Beijing.

| predominant phyla (relative abundance>5%) | low abundant phyla (relative abundance >0.1%) | fewer phyla (present in most of the samples) | rare phyla (present in several of the samples) |
|-------------------------------------------|-----------------------------------------------|----------------------------------------------|------------------------------------------------|
| p__Proteobacteria                         | p__Planctomycetes                             | p__Spirochaetes                              | p__AC1                                         |
| p__Acidobacteria                          | p__Chloroflexi                                | p__TM6                                       | p__AD3                                         |
| p__Bacteroidetes                          | p__Nitrospirae                                | p__Tenericutes                               | p__AncK6                                       |
| p__Actinobacteria                         | p__Armatimonadetes                            | p__WPS-2                                     | p__Deferribacteres                             |
| p__Gemmatimonadetes                       | p__OD1                                        | p__WS2                                       | p__FCPU426                                     |
| p__Verrucomicrobia                        | p__Cyanobacteria                              | p__Thermi                                    | p__Fusobacteria                                |
|                                           | p__TM7                                        | p__NKB19                                     | p__GN04                                        |
|                                           | p__WS3                                        | p__OP11                                      | p__GOUTA4                                      |
|                                           | p__OP3                                        | p__BHI80-139                                 | p__Kazan-3B-28                                 |
|                                           | p__Firmicutes                                 | p__BRC1                                      | p__Lentisphaerae                               |
|                                           | p__Elusimicrobia                              | p__Chlamydiae                                | p__NC10                                        |
|                                           | p__FBP                                        | p__Fibrobacteres                             | p__PAUC34f                                     |
|                                           |                                               | p__GN02                                      | p__SBR1093                                     |
|                                           |                                               | p__GAL15                                     | p__SR1                                         |
|                                           |                                               | p__MVP-21                                    | p__ZB3                                         |
|                                           |                                               |                                              | p__Caldithrix                                  |

**Table S4** Pearson correlations(r) between bacterial diversity (Faith's PD, OTUs) and soil and site characteristics.

| r    | Rings  | TC     | TN     | pH      | SBD    | Moisture | EC     |
|------|--------|--------|--------|---------|--------|----------|--------|
| PD   | -0.128 | -0.078 | -0.042 | 0.401** | -0.017 | 0.199    | -0.219 |
| OTUs | 0.03   | -0.099 | -0.092 | 0.446** | 0.028  | 0.01     | -0.25  |

TC, total carbon; TN, total nitrogen; SBD, soil bulk density; EC, electrical conductivity; \*\* $P < 0.01$ .
